1 **Pathway-based Rare Variant Burden Analysis Identifies a Role for the Complement System in an**  
2 **Extreme Phenotype of Sepsis with Coagulopathy**

3 Pavan K. Bendapudi<sup>1,2,3</sup>, Sumaiya Nazeen<sup>3,4</sup>, Justine Ryu<sup>1,3</sup>, Onuralp Söylemez<sup>3,4</sup>, Betty Rouaisnel<sup>5</sup>,  
4 Meaghan Colling<sup>2,3</sup>, Bryce Pasko<sup>6</sup>, Alissa Robbins<sup>7</sup>, Michael Bouzinier<sup>3,4</sup>, Lindsay Tomczak<sup>1</sup>, Lindsay  
5 Collier<sup>1</sup>, Sanjay Ram<sup>8</sup>, Agnes Toth-Petroczy<sup>3,4</sup>, Joel Krier<sup>3,4</sup>, Elizabeth Fieg<sup>4</sup>, Walter H. Dzik<sup>2,3</sup>, James  
6 C. Hudspeth<sup>9,10</sup>, Olga Pozdnyakova<sup>3,11</sup>, Valentina Nardi<sup>3,12</sup>, Richard Maas<sup>3,4</sup>, Shamil Sunyaev<sup>3,4</sup>, Julie-  
7 Aurore Losman<sup>3,5,13\*</sup>

8 <sup>1</sup>Division of Hemostasis and Thrombosis, Beth Israel Deaconess Medical Center, Boston, MA; <sup>2</sup>Division  
9 of Hematology and Blood Transfusion Service, Massachusetts General Hospital, Boston, MA; <sup>3</sup>Harvard  
10 Medical School, Boston, MA; <sup>4</sup>Division of Genomic Medicine, Brigham and Women's Hospital, Boston,  
11 MA; <sup>5</sup>Department of Medical Oncology, Dana-Farber Cancer Institute, Boston, MA; <sup>6</sup>Department of  
12 Pathology, University of Colorado School of Medicine; <sup>7</sup>Immunology Division, Walter and Eliza Hall  
13 Institute of Medical Research, Melbourne, Australia; <sup>8</sup>Division of Infectious Diseases and Immunology,  
14 University of Massachusetts Medical School, Worcester, MA; <sup>9</sup>Department of Medicine, Boston  
15 Medical Center, Boston, MA; <sup>10</sup>Boston University School of Medicine, Boston, MA; <sup>11</sup>Department of  
16 Pathology, Brigham and Women's Hospital, Boston, MA; <sup>12</sup>Department of Pathology, Massachusetts  
17 General Hospital, Boston, MA; <sup>13</sup>Division of Hematology, Brigham and Women's Hospital, Boston,  
18 MA

19 \*Email of corresponding author: [julieaurore\\_losman@dfci.harvard.edu](mailto:julieaurore_losman@dfci.harvard.edu)

20 **Extreme disease phenotypes have the potential to provide key pathophysiologic insights, but the**  
21 **study of these conditions is challenging due to their rarity and the limited statistical power of**  
22 **existing methods. Herein, we apply a novel pathway-based approach to investigate the role of rare**  
23 **genomic variants in infectious purpura fulminans (PF)<sup>1,2</sup>, an extreme phenotype of sepsis with**  
24 **hyperinflammation and coagulopathy for which the role of inherited risk factors is currently**  
25 **unknown. Using whole exome sequencing, we found a significantly increased burden of rare,**  
26 **putatively function-altering coding variants in the complement system in patients with PF**  
27 **compared to unselected patients with sepsis ( $p$ -value = 0.01). Functional characterization of a**  
28 **subset of PF-associated variants in integrin complement receptors 3 and 4 (CR3 and CR4) revealed**  
29 **that they exhibit a pro-inflammatory phenotype. Our results suggest that rare inherited defects**  
30 **in the complement system predispose individuals to the maladaptive hyperinflammatory response**  
31 **that characterizes severe sepsis.**

32 Rare coding variants are instrumental in identifying genes and pathways involved in disease biology.  
33 However, analyses of rare variants using traditional single-variant and single-gene association tests often  
34 fail even with large sample sizes<sup>3</sup>, and the assembly of patient cohorts with uncommon diseases presents  
35 an additional challenge. Two strategies can overcome these barriers: (i) conducting extreme phenotype  
36 studies (EPS) to amplify the effects of rare variants<sup>21-24</sup>, and (ii) leveraging prior biological knowledge  
37 by applying collapsing tests at the level of pathways in which multiple genes function together with  
38 directionally consistent effects<sup>4-6</sup>.

39 In sepsis, dysregulation of the host response to infection causes harmful levels of systemic inflammation,  
40 leading to end-organ damage<sup>7</sup>. The clinical acuity of sepsis varies dramatically, and it is currently  
41 impossible to predict which patients will experience a severe disease course. Attempts to identify genetic  
42 factors underlying the risk for sepsis have been limited to small genome wide association studies  
43 (GWAS)<sup>8-11</sup> and a single whole exome sequencing study of 74 patients<sup>12</sup>. However, due to the

44 heterogeneity of the patient population, the lack of a narrowly defined clinical phenotype, the diversity  
45 of pathogens involved in sepsis, and the inherent limitations of GWAS, these efforts have been largely  
46 inconclusive. A well-designed EPS focusing on pathways that could plausibly contribute to disease  
47 pathophysiology has the potential to overcome these challenges and elucidate novel biology that is  
48 generalizable to the broader population of septic patients.

49 To identify genetic risk factors for severe sepsis, we undertook a case-controlled EPS of the complement  
50 system in infectious PF, an exceptionally rare and devastating extreme sepsis phenotype<sup>1</sup>. The defining  
51 feature of PF is uncontrolled systemic inflammation and thrombotic coagulopathy resulting in  
52 microvascular thrombosis, end-organ damage, and death. Mortality is as high as 80%, and survivors  
53 typically experience extensive scarring and dismemberment<sup>1,2,13</sup>. The complement system (**Figure 1A**),  
54 which is responsible for the initial inflammatory response to infection, has long been considered a key  
55 driver of inflammation in severe sepsis and PF<sup>14-17</sup>. Microbes directly activate the humoral complement  
56 cascade, a tightly-regulated series of proteolytic reactions that result in pathogen destruction by the  
57 membrane attack complex (MAC) and release of highly inflammatory microbial cell components.  
58 Activated complement proteins also function as potent inflammatory mediators (anaphylatoxins) that  
59 promote shock and other features of sepsis. During this process, the complement fragment C3b is  
60 deposited on microbial surfaces, where it is converted to iC3b, a potent opsonin that binds integrin  
61 complement receptors CR3 and CR4 on macrophages<sup>18,19</sup>. This leads to phagocytosis of microbes and  
62 activation of immunomodulatory signaling. Integrins are each composed of an  $\alpha$  and a  $\beta$  subunit,  
63 different combinations of which give rise to receptors with distinct physiologic roles. CR3 ( $\alpha_M\beta_2$ ) is  
64 composed of integrin  $\beta_2$  (*ITGB2*) paired with integrin  $\alpha_M$  (*ITGAM*), whereas CR4 ( $\alpha_X\beta_2$ ) is composed of  
65 integrin  $\beta_2$  paired with integrin  $\alpha_X$  (*ITGAX*). Intracellular signaling via CR3 promotes an anti-  
66 inflammatory and immunoregulatory cytokine profile, whereas CR4 signaling promotes a pro-  
67 inflammatory state (**Figure 1B**)<sup>20-22</sup>. Given that inflammation stemming from infection is strongly

68 associated with aberrant activation of coagulation<sup>23-25</sup>, we reasoned that rare function-altering mutations  
69 in the complement system could plausibly contribute to the pathophysiology of PF.

70 To assemble a sequencing cohort of patients with this rare, highly lethal condition, we combined  
71 prospective sample collection with a unique automated “look back” approach in which we leveraged  
72 natural language processing to perform enterprise-scale deep mining of the electronic medical record  
73 system to identify historical cases of PF. Using this technique, we were able to locate archived pathology  
74 specimens suitable for germline sequencing from PF patients who were deceased or lost to follow up.  
75 In total, we identified 40 clinically well-annotated PF patient samples and, as controls, utilized 87  
76 unselected patients with sepsis from the NHLBI ARDSnet iSPAAR consortium (**Supplementary Tables**  
77 **1 and 2**). Whole exome sequencing data from all 127 samples were jointly called using the GATK  
78 pipeline v3.5. After performing variant-level and sample-level quality control (QC), we removed three  
79 PF patient samples (**Supplementary Figure 1**). In the remaining specimens, we analyzed qualifying  
80 variants in the complement system with a gnomAD global minor allele frequency (MAF) of < 0.05 as  
81 well as those with an optimal in-cohort frequency cutoff selected using a variable thresholds (VT)  
82 approach<sup>26</sup>. Missense variants predicted to be “deleterious” or “possibly deleterious” by either  
83 PolyPhen2 or SIFT were grouped with high-precision loss of function (LoF) variants (stop gained, stop  
84 lost, splice donor, splice acceptor, splice region variant, and frameshift and in-frame indel) and together  
85 were termed “ΔP variants.”

86 Interrogating the effects of rare variants in a pathway using an EPS design requires addressing two issues.  
87 Firstly, population structure can inflate the false positive rate in both the common and rare variant  
88 space<sup>27</sup>. This issue can be mitigated by analyzing EPS cohorts of a single ancestry. Secondly, existing  
89 pathway-based collapsing approaches frequently focus only on the presence or absence of rare variants  
90 and are of limited value because many individuals will have at least one rare variant in a large pathway.

91 This challenge necessitates a new test that focuses on the number of qualifying rare variants rather than  
92 simply their presence or absence.

93 To assess population structure, we performed principal component analysis (PCA) on the study samples  
94 ([Supplementary Figure 2](#)). We found that all 87 sepsis controls but only 24/37 PF patients were of  
95 European descent, and we therefore limited our primary analysis to individuals of European ancestry.  
96 To rule out the possibility that other unrecognized population structures could introduce bias into our  
97 analysis, we evaluated the distribution of ultra-rare (i.e., doubletons and tripletons) missense and  
98 synonymous variants shared between the 24 European PF cases and 87 controls and observed no  
99 significant differences ([Supplementary Table 3](#)).

100 Across the entire Boston PF Cohort (N=37), we identified a total of 58 unique missense variants in the  
101 complement system (N = 27 autosomal genes) ([Supplementary Table 4](#)) with MAF < 0.05, of which  
102 42 were present only in the PF cohort and 16 were present in both the PF and control cohorts ([Table 1](#)  
103 [and Supplementary Tables 5 and 6](#)). Of these, 32 (55.2%) were annotated as functionally significant  
104 *in silico*. We also found 26 high-precision LoF variants. Of these, 22 were specific to PF patients and 4  
105 were found in both PF and control patients. In total, 58 unique  $\Delta P$  variants were identified in PF patients.  
106 In the control cohort of unselected patients with sepsis (N=87), we identified a total of 68 unique rare  
107 missense variants, of which 52 were present only among the controls and 16 were present in both cohorts.  
108 Of these, 39/68 (57.3%) were putatively function altering. The control cohort also contained 15 high-  
109 precision LoF variants, for a total of 54  $\Delta P$  variants. Of note, inclusion of non-European PF patients  
110 increased the burden of rare  $\Delta P$  variants when compared to the European-only PF patient cohort  
111 ([Supplementary Figure 3](#)), which suggests that PF patients have an increased proportion of rare  $\Delta P$   
112 variants in the complement system regardless of ethnic background. However, we cannot validate this  
113 conclusion without a control cohort having the same population structure.

114 To determine whether  $\Delta P$  variants are enriched in PF patients, we devised a novel rare variant trend test  
115 (RVTT) utilizing the Cochran-Armitage statistic to assess the relationship between complement system  
116 variant burden and disease status<sup>28,29</sup>. We performed RVTT on the European PF patients (N=24) and  
117 sepsis controls (N=87) using a fixed gnomAD MAF cutoff of 0.05 as well as a variable thresholds  
118 approach with or without an in-cohort MAF cutoff. We observed a significant linear trend in the number  
119 of complement system  $\Delta P$  variants in the PF patients compared to controls (gnomAD cutoff: permutation  
120 p-value = 0.0168, z-score = 2.5; VT approach with MAF cutoff up to 0.05: permutation p-value = 0.0134,  
121 z-score = 2.62; VT approach without cutoff: p-value = 0.0278, z-score = 2.72) (**Table 2, Figure 1C**).  
122 To determine whether the association of  $\Delta P$  variants with PF was independent of clinical and  
123 demographic parameters, we generated a multivariate logistic regression model incorporating age, sex,  
124 and Sequential Organ Failure Assessment (SOFA) score, a validated composite measure of illness  
125 severity in critical care patients that encompasses 8 distinct clinical criteria<sup>30</sup>. After adjusting for these  
126 co-variables, we found that the number of  $\Delta P$  variants per subject independently predicted PF in the  
127 patients of European ancestry (OR=2.61 per  $\Delta P$  variant, 95% CI: 1.29-6.1, P=0.01) (**Table 3**). Including  
128 all patients in the analysis yielded a similar result. This finding suggests that multiple  $\Delta P$  variants in a  
129 single patient contribute to the development of PF and orthogonally confirms the association found using  
130 RVTT.

131 Notably, a simple one-sided collapse and combine (CMC) Fisher's exact test of  $\Delta P$  variants in the  
132 complement system at a gnomAD global MAF cutoff of 0.05 was borderline significant (p-value:  
133 0.0418) (**Supplementary Table 7**), and when we performed gene-based collapsing analyses using the  
134 CMC-Fisher<sup>31</sup>, VT-Price<sup>26</sup>, KBAC<sup>32</sup>, and SKAT<sup>33</sup> tests, none of the genes in the complement system  
135 individually showed a significant enrichment of rare  $\Delta P$  variants in PF cases after Bonferroni correction  
136 (**Supplementary Table 8**). This result further supports our approach of performing a pathway-based  
137 collapsing analysis that leverages prior biological knowledge. Finally, to rule out the possibility that the

138 observed  $\Delta P$  RVTT signal resulted from a technical artifact, we repeated RVTT with synonymous and  
139 predicted functionally neutral missense variants in the complement pathway and observed no significant  
140 linear trend (**Table 2, Figure 1C**). To further ensure the validity of our findings, we also performed  
141 RVTT on two additional gene sets: (i) the coagulation system, a distinct pathway that could plausibly be  
142 implicated in PF, and (ii) glycolysis, an unrelated pathway (**Supplementary Table 4**). Neither gene set  
143 demonstrated an enrichment in  $\Delta P$  variants in the PF cohort (**Table 2, Figure 1D**).

144 Of the 58 unique  $\Delta P$  variants identified in PF patients, 15 (25.9%) were found in genes encoding subunits  
145 of CR3 and CR4. Given the dearth of functional data on these variants and their high frequency in PF  
146 patients, we cloned all 11 *ITGB2*, *ITGAM*, and *ITGAX* variants found in the Boston PF cohort  
147 (**Supplementary Figure 4**) and characterized the resultant CR3 and CR4 receptors. We found that  
148 intracellular expression levels of all the cloned variants were similar (**Supplementary Figure 5**).  
149 However, cell-surface expression of the CR3 variants was significantly lower than that of wild-type CR3  
150 (**Figure 2A**), whereas cell-surface expression of the CR4 variants was similar to that of wild-type CR4  
151 (**Figure 2B**). Notably, the D283N mutation in the shared  $\beta_2$  subunit resulted in complete loss of CR3  
152 surface expression without affecting the surface level of CR4. We also assessed binding of the variants  
153 to iC3b. Of the CR3 variants, 6/8 (75%) demonstrated significantly reduced binding to iC3b compared  
154 to wild-type CR3 (**Figure 2C**). By contrast, 4/7 (57.1%) CR4 variants showed similar iC3b binding to  
155 wild-type and, unexpectedly, 3/7 (42.9%) demonstrated increased binding compared to wild-type CR4  
156 (**Figure 2D**). Given that the mutant CR4 lines all expressed equivalent or slightly reduced surface levels  
157 compared to wild-type, the observed increase in iC3b binding to specific CR4 mutants likely reflects an  
158 increased affinity of those mutants for iC3b. Finally, we used a dual-luciferase reporter assay to assess  
159 the impact of the PF-associated CR3 and CR4 variants on TNF $\alpha$ -mediated activation of the canonical  
160 pro-inflammatory transcription factor NF- $\kappa$ B. Relative to untransfected control cells, NF- $\kappa$ B activation  
161 was suppressed by expression of wild-type CR3 and was enhanced by expression of wild-type CR4

162 (**Figure 3A**). The 7 expressed CR3 variants were associated with increased activation of NF- $\kappa$ B  
163 compared to wild-type CR3. 6/7 (85.7%) CR4 variants showed increased NF- $\kappa$ B activation compared  
164 to wild-type CR4. Taken together, these findings suggest that PF-associated CR3/4 variants result in a  
165 relative loss of anti-inflammatory CR3 function and a relative gain of pro-inflammatory CR4 function.

166 In summary, we applied RVTT, a new pathway-based mutational burden analysis approach, to an EPS  
167 of sepsis and demonstrated a relationship between rare, putatively function-altering complement system  
168 variants and the development of infectious PF. Functional characterization of PF-associated complement  
169 receptor variants identified mutations that result in loss of anti-inflammatory signaling (**Figure 3B**) or  
170 gain of pro-inflammatory signaling (**Figure 3C**), consistent with the phenotype of severe sepsis with  
171 coagulopathy<sup>34</sup>. We also identified several examples of single mutations in the shared complement  
172 receptor subunit integrin  $\beta_2$  that simultaneously enhance pro-inflammatory signaling and abrogate anti-  
173 inflammatory signaling (**Figure 3D**), a novel finding in complement receptor biology. Our genetic and  
174 functional studies support a model in which PF is driven by a genetically-encoded maladaptive  
175 inflammatory response to infection, findings that will help to risk-stratify patients with sepsis and inform  
176 the development of novel strategies to treat the thrombo-inflammatory complications of severe infection.  
177 This study also serves as a model for leveraging known biological pathways to gain insights into the  
178 genetics of extreme phenotypes and rare conditions.

179 Several questions remain that warrant further investigation. Firstly, due to the limited availability of  
180 clinical cases, we were unable to analyze the roles of specific microbes in the pathogenesis of PF.  
181 Secondly, our approach cannot rule out that other, as yet unidentified, genetic modifiers influence the  
182 predisposition to PF. Despite these limitations, this study represents an important step forward in  
183 defining the genetic determinants of severe sepsis.



184 **Table 1: Complement system variants found in the study cohorts.** The number and types of  
185 complement system variants identified in the Boston PF cohort (PF) (N = 37) and the NHLBI ARDSnet  
186 iSPAAR Unselected Sepsis (US) cohort (N = 87).

|                       | <b>Total PF-associated variants</b> | <b>Total US associated-variants</b> | <b>PF-specific variants</b> | <b>US-specific variants</b> | <b>Shared variants</b> |
|-----------------------|-------------------------------------|-------------------------------------|-----------------------------|-----------------------------|------------------------|
| Neutral               | 26                                  | 29                                  | 16                          | 19                          | 10                     |
| Missense              | 58                                  | 68                                  | 42                          | 52                          | 16                     |
| Missense <sup>F</sup> | 32                                  | 39                                  | 26                          | 33                          | 6                      |
| HP LoF                | 26                                  | 15                                  | 22                          | 11                          | 4                      |
| $\Delta P$ variants   | 58                                  | 54                                  | 48                          | 44                          | 10                     |

187 Missense<sup>F</sup> = missense variants predicted *in silico* to cause altered protein function

188 HP LoF = high-precision loss-of-function

189  $\Delta P$  variants = Missense<sup>F</sup> + HP LoF

190 **Table 2. Rare variant burden assessed by Rare Variant Trend Test (RVTT) in quality-filtered**  
 191 **European PF cases (N=24) and sepsis controls (N=87).** We applied RVTT on three gene sets: the  
 192 complement system, the coagulation system, and the glycolysis pathway. For each gene set, we tested  
 193 rare  $\Delta P$ , synonymous, and neutral missense variants. Qualifying rare variants were selected using three  
 194 settings: (i) fixed threshold: gnomAD MAF < 0.05, (ii) variable threshold with no cutoff, and (iii)  
 195 variable threshold with a cutoff of MAF = 0.05. We observed a significant enrichment of rare  $\Delta P$  variants  
 196 in the complement system under all three settings.

| Type                      | RVTT-Fixed Test Statistic (gnomAD cutoff) | RVTT-Fixed Perm p-value (gnomAD cutoff) | RVTT-Variable Selected Threshold (No Cutoff) | RVTT-Variable Test Statistic (No Cutoff) | RVTT-Variable Perm p-value (No Cutoff) | RVTT-Variable Selected Threshold (cutoff = 0.05) | RVTT-Variable Test Statistic (cutoff = 0.05) | RVTT-Variable Perm p-value (cutoff = 0.05) |
|---------------------------|-------------------------------------------|-----------------------------------------|----------------------------------------------|------------------------------------------|----------------------------------------|--------------------------------------------------|----------------------------------------------|--------------------------------------------|
| Complement System Pathway |                                           |                                         |                                              |                                          |                                        |                                                  |                                              |                                            |
| $\Delta P$ variants       | 2.4951                                    | <b>0.0168</b>                           | 0.0833                                       | 2.7229                                   | <b>0.0278</b>                          | 0.0463                                           | 2.6236                                       | <b>0.0134</b>                              |
| Synonymous                | 1.5071                                    | 0.1368                                  | 0.25                                         | 1.1308                                   | 0.8166                                 | 0.0463                                           | 1.0267                                       | 0.4438                                     |
| Neutral missense          | 1.0195                                    | 0.323                                   | 0.3704                                       | 1.0636                                   | 0.8954                                 | 0.0463                                           | 0.7881                                       | 0.7237                                     |
| Coagulation Pathway       |                                           |                                         |                                              |                                          |                                        |                                                  |                                              |                                            |
| $\Delta P$ variants       | 1.3329                                    | 0.1866                                  | 0.015                                        | 0.9856                                   | 0.5718                                 | 0.0114                                           | 0.9856                                       | 0.6519                                     |
| Synonymous                | 1.68                                      | 0.0996                                  | 0.205                                        | 1.4318                                   | 0.3251                                 | 0.0114                                           | 1.2291                                       | 0.4873                                     |
| Neutral missense          | 0.7912                                    | 0.4864                                  | 0.068                                        | 1.3924                                   | 0.4095                                 | 0.0265                                           | 0.8997                                       | 0.7392                                     |
| Glycolysis Pathway        |                                           |                                         |                                              |                                          |                                        |                                                  |                                              |                                            |
| $\Delta P$ variants       | 0.0536                                    | 0.9563                                  | 0.035                                        | 1.0827                                   | 0.5804                                 | 0.0315                                           | 1.0827                                       | 0.5265                                     |
| Synonymous                | 0.1035                                    | 0.9256                                  | 0.185                                        | 1.4843                                   | 0.309                                  | 0.0079                                           | 0.8554                                       | 0.7307                                     |
| Neutral missense          | 0.3942                                    | 0.7607                                  | 0.169                                        | 1.8254                                   | 0.2089                                 | 0.0118                                           | 0.6315                                       | 0.7491                                     |

197 **Table 3: Multivariate logistic regression model of predictors of purpura fulminans.**

| <b>EUR Only Analysis (N=111)</b>     |          |           |                     |                |
|--------------------------------------|----------|-----------|---------------------|----------------|
|                                      | <b>β</b> | <b>SE</b> | <b>OR (95% CI)</b>  | <b>P value</b> |
| ΔP variants                          | 0.96     | 0.39      | 2.61 (1.29-6.1)*    | 0.01           |
| Sex                                  | -1.58    | 0.93      | 0.21 (0.03-1.18)    | 0.09           |
| Age                                  | -0.05    | 0.02      | 0.95 (0.91-0.99)†   | 0.02           |
| SOFA Score <sup>††</sup>             | 0.67     | 0.16      | 1.96 (1.49-2.87)††† | <0.0001        |
| <b>Entire Study Analysis (N=124)</b> |          |           |                     |                |
|                                      | <b>β</b> | <b>SE</b> | <b>OR (95% CI)</b>  | <b>P value</b> |
| ΔP variants                          | 1.05     | 0.33      | 2.85 (1.58-5.90)*   | 0.002          |
| Sex                                  | -1.02    | 0.81      | 0.36 (0.07-1.72)    | 0.21           |
| Age                                  | -0.06    | 0.02      | 0.94 (0.90-0.98)†   | 0.005          |
| SOFA Score <sup>††</sup>             | 0.75     | 0.17      | 2.12 (1.59-3.16)††† | <0.0001        |

198 \* Per ΔP variant

199 †Per year of age

200 ††Composite measure comprised of: PaO<sub>2</sub>, FiO<sub>2</sub>, mechanical ventilation status, platelet count, Glasgow  
201 Coma Scale, total bilirubin level, mean arterial pressure, and creatinine level.

202 ††† Per one point increase in SOFA score

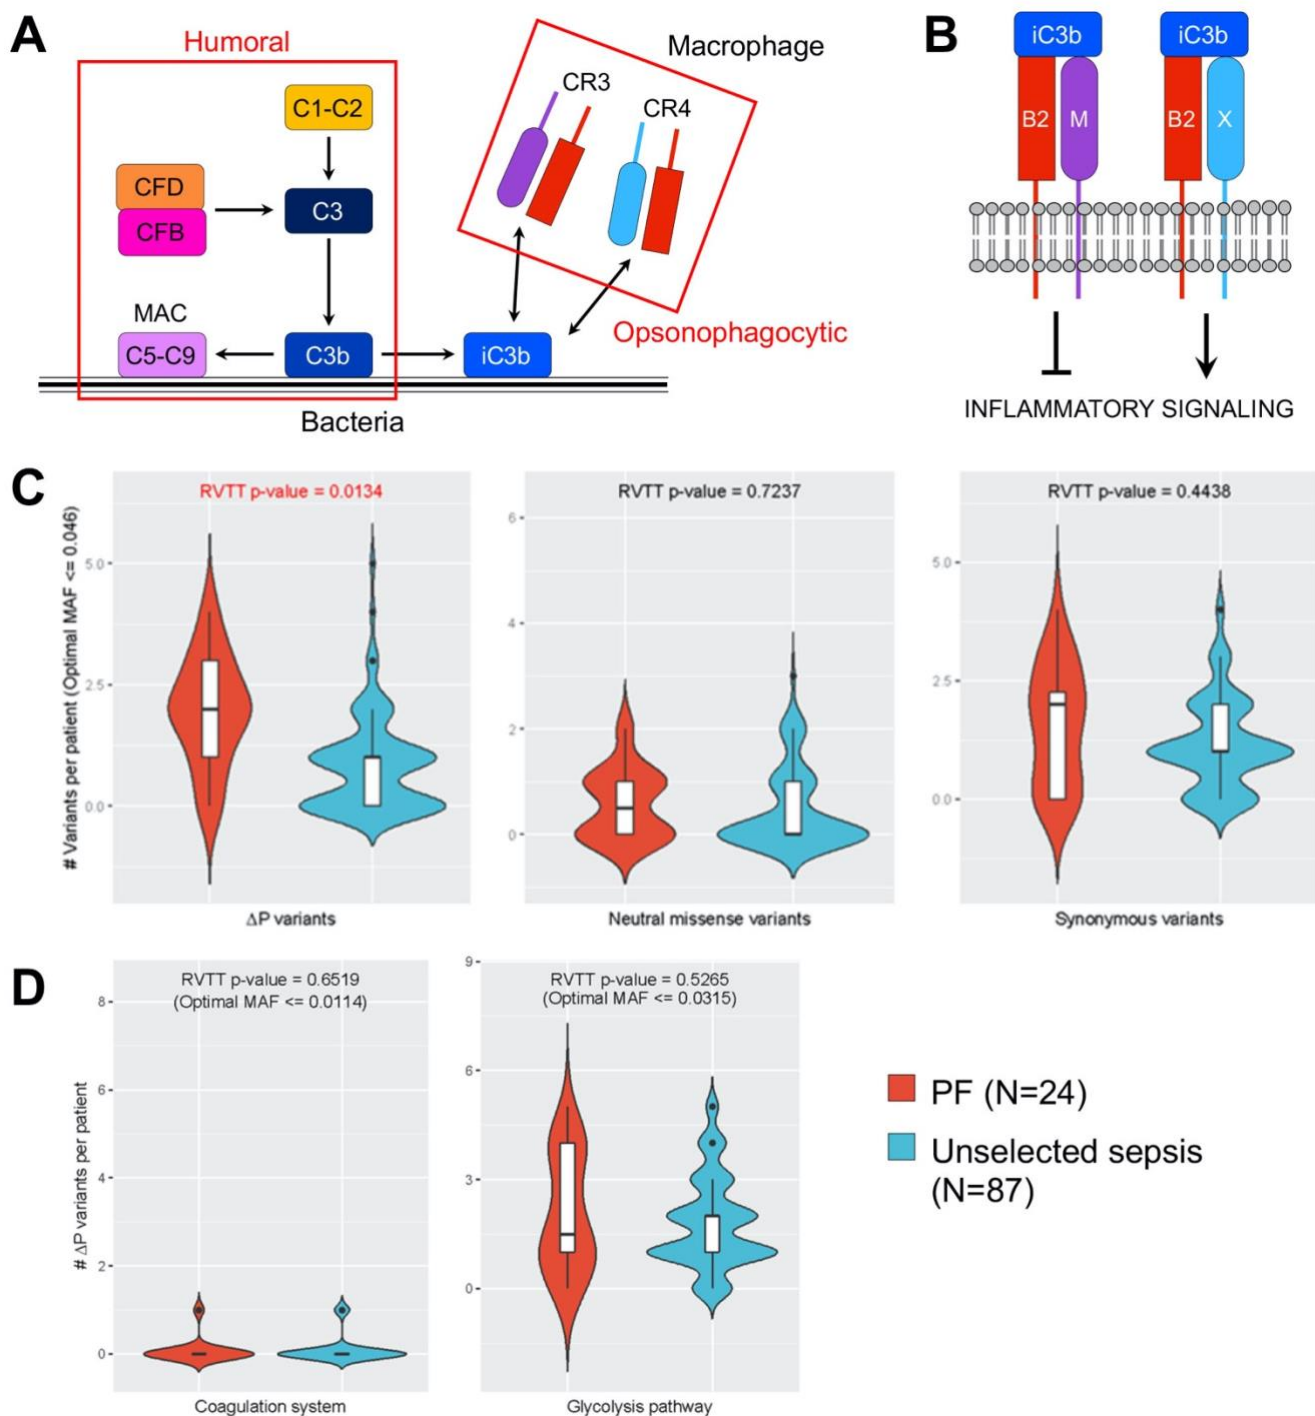

203 **Figure 1: Mutational Analysis of Purpura Fulminans.** (A) Schematic of the complement system.  
 204 The complement system is broadly divided into two sub-pathways: humoral and opsonophagocytic. The  
 205 humoral sub-pathway is comprised of soluble plasma proteins responsible for destroying  
 206 microorganisms via formation of the membrane attack complex (MAC), which permeabilizes the surface

207 of the target cell. The opsonophagocytic sub-pathway is comprised of cellular receptors that recognize  
208 complement fragments deposited on microbial surfaces and facilitate phagocytosis and pathogen  
209 clearance. **(B)** Heterodimerization of integrin  $\beta_2$  (B2) with integrin  $\alpha_M$  (M) forms the anti-inflammatory  
210 signaling mediator complement receptor 3 (CR3) whereas heterodimerization of B2 with integrin  $\alpha_X$  (X)  
211 forms the pro-inflammatory signaling mediator complement receptor 4 (CR4). **(C)** RVTT analyses  
212 comparing the European PF Cohort (PF) and the NHLBI ARDSnet iSPAAR cohort (Unselected Sepsis)  
213 in terms of  $\Delta P$  variants (left panel), neutral missense variants (middle panel), and synonymous various  
214 (right panel). **(D)** RVTT analyses comparing the two cohorts in terms of  $\Delta P$  variants in the coagulation  
215 system (left panel) and glycolysis pathway (right panel).

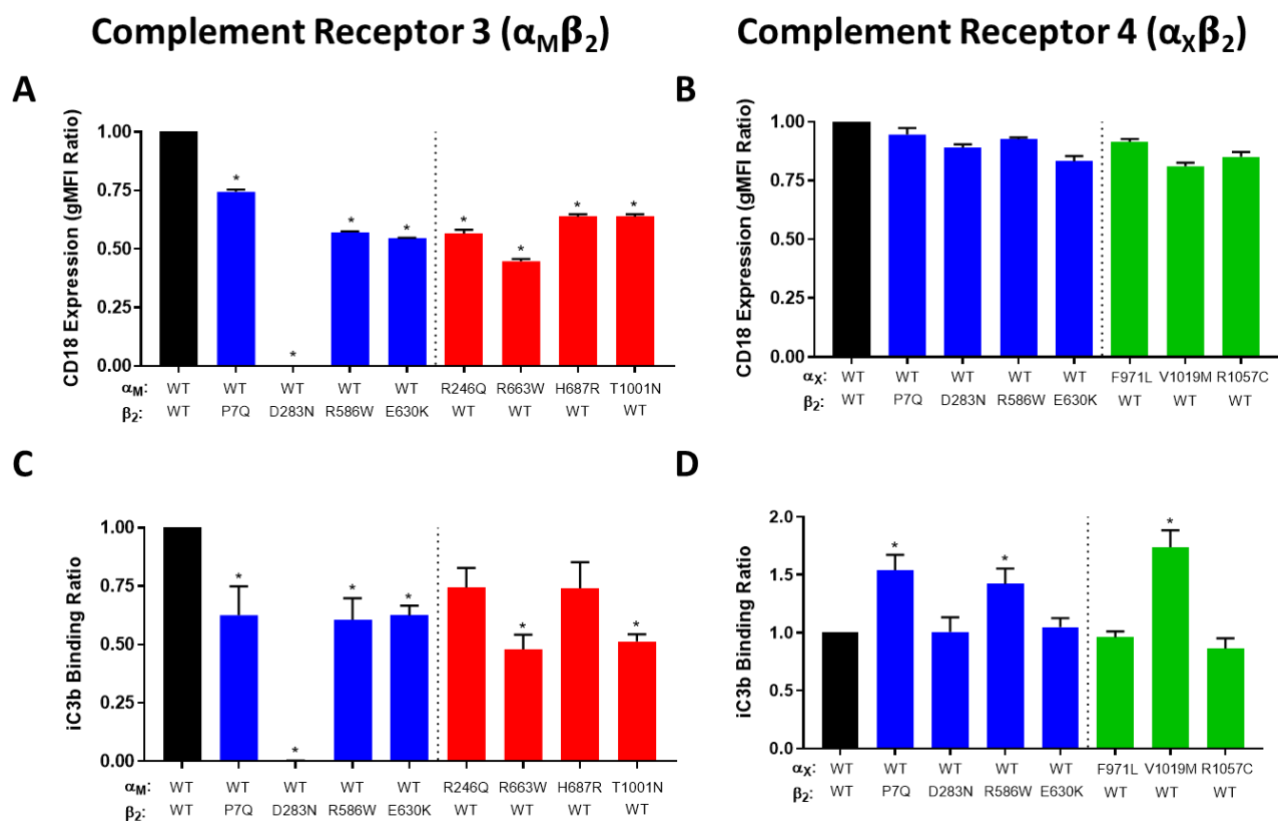

216 **Figure 2: Expression and ligand binding of the CR3 and CR4 variants.** (A-B) Wild-type (WT) and  
 217 mutant complement receptors were cloned and expressed in HEK-293T cells, and surface expression  
 218 levels of CR3 (A) and CR4 (B) were evaluated by flow cytometry for integrin  $\beta_2$  (ITGB2/CD18). WT  
 219 CR3 and CR4 are depicted in black. Receptors containing a mutant integrin  $\beta_2$  subunit are depicted in  
 220 blue, those with a mutant integrin  $\alpha_M$  (ITGAM) subunit are depicted in red, and those with a mutant  
 221 integrin  $\alpha_X$  (ITGAX) subunit are depicted in green. (C-D) The ability of receptor-expressing cells to  
 222 bind immobilized iC3b was assessed in a solid-phase functional assay. iC3b binding activity of WT and  
 223 mutant CR3 (C) and WT and mutant CR4 (D) are shown. ITGB2 P7Q, ITGAM R663W, ITGAM  
 224 H687R, ITGAM T1001N, and ITGAX V1019M were predicted *in silico* to be benign. \*P<0.05 compared  
 225 to WT/WT control.

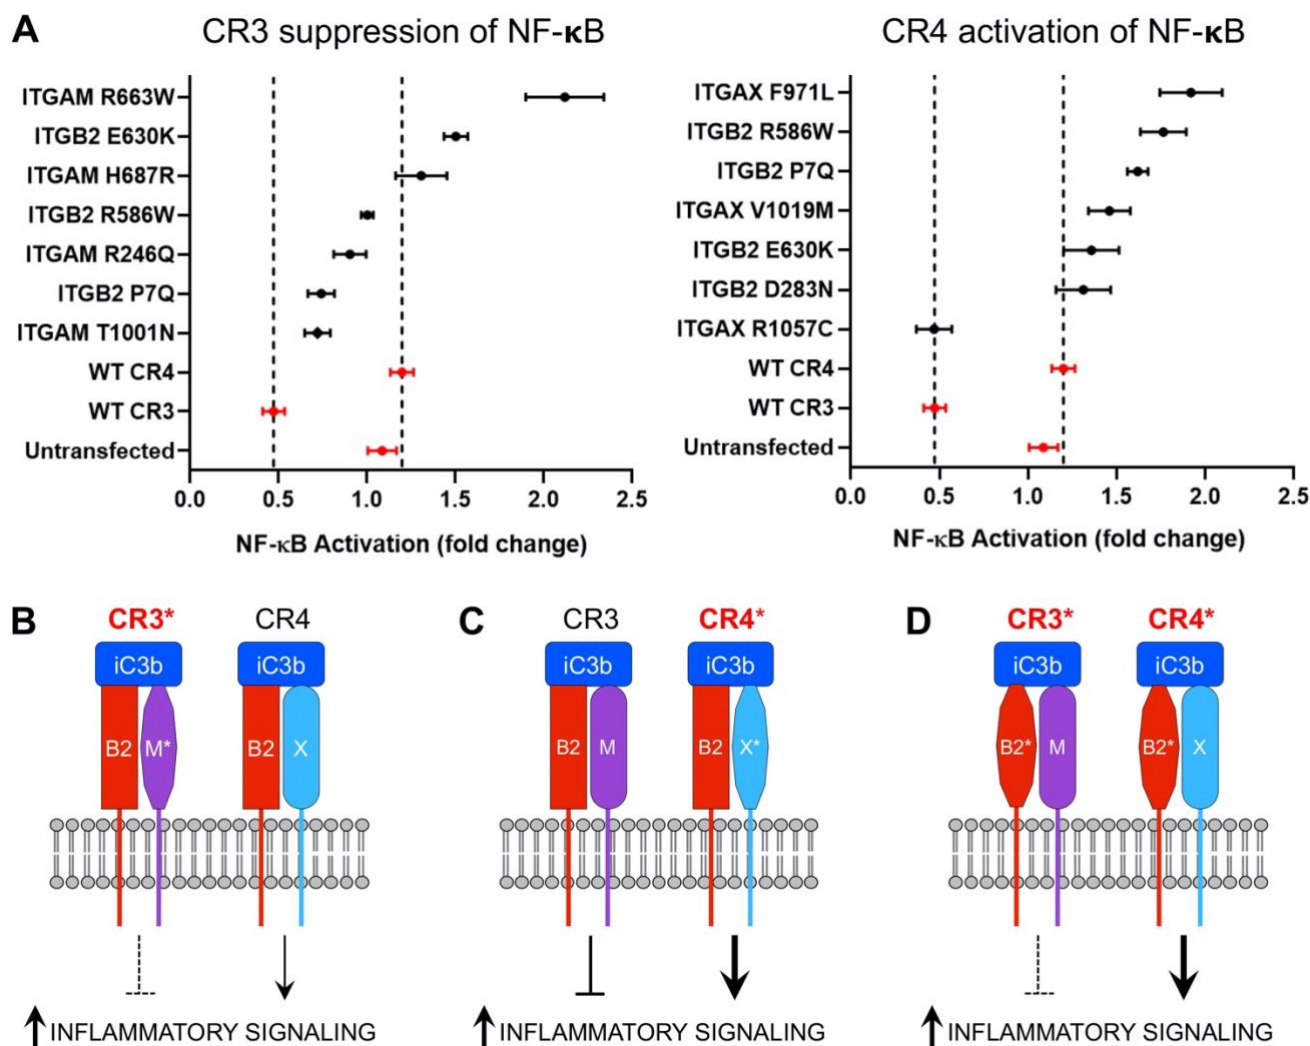

226 **Figure 3: Signaling by the CR3 and CR4 variants.** (A) TNF $\alpha$ -mediated activation of an NF- $\kappa$ B dual  
 227 luciferase reporter in cells expressing the PF-associated CR3 variants (left panel) or CR4 variants (right  
 228 panel) in the presence or absence of the CR3/CR4 ligand iC3b. Control HEK-293T cells not expressing  
 229 CR3 or CR4 (untransfected) and HEK-293T cells expressing wild-type or mutant CR3 or CR4 were used  
 230 as negative and positive controls, respectively. Data are shown as the mean fluorescence intensity ratio  
 231 of the iC3b-plus condition to the iC3b-minus condition. Error bars represent standard error of the mean.  
 232 (B) PF-associated mutations in *ITGAM* (M\*) reduce the ability of mutant CR3 (CR3\*) to suppress  
 233 inflammatory signaling. (C) PF-associated mutations in *ITGAX* (X\*) enhance the ability of mutant CR4  
 234 (CR4\*) to activate inflammatory signaling. (D) PF-associated mutations in the shared subunit *ITGB2*

235 (B2\*) simultaneously decrease suppression of inflammatory signaling by CR3\* and increase activation  
236 of inflammatory signaling by CR4\*.



## 237 **References**

- 238 1. Colling ME, Bendapudi PK. Purpura Fulminans: Mechanism and Management of Dysregulated  
239 Hemostasis. *Transfusion medicine reviews* 2018;32(2):69-76. (In eng).
- 240 2. Lerolle N, Carlotti A, Melican K, et al. Assessment of the interplay between blood and skin vascular  
241 abnormalities in adult purpura fulminans. *American journal of respiratory and critical care medicine*  
242 2013;188(6):684-92. (In eng). DOI: 10.1164/rccm.201302-0228OC.
- 243 3. Povysil G, Petrovski S, Hostyk J, Aggarwal V, Allen AS, Goldstein DB. Rare-variant collapsing analyses for  
244 complex traits: guidelines and applications. *Nature reviews Genetics* 2019;20(12):747-759. (In eng).  
245 DOI: 10.1038/s41576-019-0177-4.
- 246 4. Lee S, Choi S, Kim YJ, Kim BJ, Hwang H, Park T. Pathway-based approach using hierarchical components  
247 of collapsed rare variants. *Bioinformatics* 2016;32(17):i586-i594. (In eng). DOI:  
248 10.1093/bioinformatics/btw425.
- 249 5. Richardson TG, Timpson NJ, Campbell C, Gaunt TR. A pathway-centric approach to rare variant  
250 association analysis. *European journal of human genetics : EJHG* 2016;25(1):123-129. (In eng). DOI:  
251 10.1038/ejhg.2016.113.
- 252 6. Kousi M, Söylemez O, Ozanturk A, et al. Evidence for secondary-variant genetic burden and non-  
253 random distribution across biological modules in a recessive ciliopathy. *Nature genetics*  
254 2020;52(11):1145-1150. (In eng). DOI: 10.1038/s41588-020-0707-1.
- 255 7. Gando S, Levi M, Toh CH. Disseminated intravascular coagulation. *Nat Rev Dis Primers* 2016;2:16037.  
256 (In eng). DOI: 10.1038/nrdp.2016.37.
- 257 8. D'Urso S, Rajbhandari D, Peach E, et al. Septic Shock: A Genomewide Association Study and Polygenic  
258 Risk Score Analysis. *Twin research and human genetics : the official journal of the International Society*  
259 *for Twin Studies* 2020;23(4):204-213. (In eng). DOI: 10.1017/thg.2020.60.
- 260 9. Rautanen A, Mills TC, Gordon AC, et al. Genome-wide association study of survival from sepsis due to  
261 pneumonia: an observational cohort study. *The Lancet Respiratory medicine* 2015;3(1):53-60. (In eng).  
262 DOI: 10.1016/s2213-2600(14)70290-5.
- 263 10. Scherag A, Schöneweck F, Kesselmeier M, et al. Genetic Factors of the Disease Course after Sepsis: A  
264 Genome-Wide Study for 28Day Mortality. *EBioMedicine* 2016;12:239-246. (In eng). DOI:  
265 10.1016/j.ebiom.2016.08.043.
- 266 11. Srinivasan L, Page G, Kirpalani H, et al. Genome-wide association study of sepsis in extremely  
267 premature infants. *Archives of disease in childhood Fetal and neonatal edition* 2017;102(5):F439-f445.  
268 (In eng). DOI: 10.1136/archdischild-2016-311545.
- 269 12. Taudien S, Lausser L, Giamarellou-Bourboulis EJ, et al. Genetic Factors of the Disease Course After  
270 Sepsis: Rare Deleterious Variants Are Predictive. *EBioMedicine* 2016;12:227-238. (In eng). DOI:  
271 10.1016/j.ebiom.2016.08.037.
- 272 13. Bendapudi PK, Robbins A, LeBoeuf N, et al. Persistence of endothelial thrombomodulin in a patient  
273 with infectious purpura fulminans treated with protein C concentrate. *Blood advances*  
274 2018;2(21):2917-2921. (In eng). DOI: 10.1182/bloodadvances.2018024430.
- 275 14. Landsem A, Fure H, Krey Ludviksen J, et al. Complement component 5 does not interfere with  
276 physiological hemostasis but is essential for Escherichia coli-induced coagulation accompanied by Toll-  
277 like receptor 4. *Clinical and experimental immunology* 2019;196(1):97-110. (In eng). DOI:  
278 10.1111/cei.13240.
- 279 15. Lappégard KT, Christiansen D, Pharo A, et al. Human genetic deficiencies reveal the roles of  
280 complement in the inflammatory network: lessons from nature. *Proc Natl Acad Sci U S A*  
281 2009;106(37):15861-6. (In eng). DOI: 10.1073/pnas.0903613106.
- 282 16. Janco RL, Morris P. Serum augments the generation of monocyte procoagulant stimulated by bacterial  
283 lipopolysaccharide or chemotactic fragments of C5. *Thrombosis research* 1983;32(1):73-86. (In eng).  
284 DOI: 10.1016/0049-3848(83)90156-1.

- 285 17. Lupu F, Keshari RS, Lambris JD, Coggeshall KM. Crosstalk between the coagulation and complement  
286 systems in sepsis. *Thrombosis research* 2014;133 Suppl 1(0 1):S28-31. (In eng). DOI:  
287 10.1016/j.thromres.2014.03.014.
- 288 18. Dustin ML. Complement Receptors in Myeloid Cell Adhesion and Phagocytosis. *Microbiology spectrum*  
289 2016;4(6) (In eng). DOI: 10.1128/microbiolspec.MCHD-0034-2016.
- 290 19. Abram CL, Lowell CA. The ins and outs of leukocyte integrin signaling. *Annual review of immunology*  
291 2009;27:339-62. (In eng). DOI: 10.1146/annurev.immunol.021908.132554.
- 292 20. Jawhara S, Pluskota E, Cao W, Plow EF, Soloviev DA. Distinct Effects of Integrins alphaXbeta2 and  
293 alphaMbeta2 on Leukocyte Subpopulations during Inflammation and Antimicrobial Responses.  
294 *Infection and immunity* 2017;85(1):e00644-16. (In eng). DOI: 10.1128/iai.00644-16.
- 295 21. Dai S, Rajaram MV, Curry HM, Leander R, Schlesinger LS. Fine tuning inflammation at the front door:  
296 macrophage complement receptor 3-mediates phagocytosis and immune suppression for *Francisella*  
297 *tularensis*. *PLoS pathogens* 2013;9(1):e1003114. (In eng). DOI: 10.1371/journal.ppat.1003114.
- 298 22. Rosetti F, Mayadas TN. The many faces of Mac-1 in autoimmune disease. *Immunological reviews*  
299 2016;269(1):175-93. (In eng). DOI: 10.1111/imr.12373.
- 300 23. Dellinger RP. Inflammation and coagulation: implications for the septic patient. *Clinical infectious*  
301 *diseases : an official publication of the Infectious Diseases Society of America* 2003;36(10):1259-65. (In  
302 eng). DOI: 10.1086/374835.
- 303 24. Levi M, van der Poll T. Coagulation and sepsis. *Thrombosis research* 2017;149:38-44. (In eng). DOI:  
304 10.1016/j.thromres.2016.11.007.
- 305 25. Levi M, Keller TT, van Gorp E, ten Cate H. Infection and inflammation and the coagulation system.  
306 *Cardiovasc Res* 2003;60(1):26-39. (In eng). DOI: 10.1016/s0008-6363(02)00857-x.
- 307 26. Price AL, Kryukov GV, de Bakker PI, et al. Pooled association tests for rare variants in exon-  
308 resequencing studies. *Am J Hum Genet* 2010;86(6):832-8. (In eng). DOI: 10.1016/j.ajhg.2010.04.005.
- 309 27. Panarella M, Burkett KM. A Cautionary Note on the Effects of Population Stratification Under an  
310 Extreme Phenotype Sampling Design. *Frontiers in genetics* 2019;10:398. (In eng). DOI:  
311 10.3389/fgene.2019.00398.
- 312 28. Cochran WG. Some Methods for Strengthening the Common  $\chi^2$  Tests. *Biometrics* 1954;10(4):417-451.
- 313 29. Armitage P. Tests for Linear Trends in Proportions and Frequencies. *Biometrics* 1955;11(3):375-386.  
314 DOI: 10.2307/3001775.
- 315 30. Vincent JL, de Mendonça A, Cantraine F, et al. Use of the SOFA score to assess the incidence of organ  
316 dysfunction/failure in intensive care units: results of a multicenter, prospective study. Working group  
317 on "sepsis-related problems" of the European Society of Intensive Care Medicine. *Critical care*  
318 *medicine* 1998;26(11):1793-800. (In eng). DOI: 10.1097/00003246-199811000-00016.
- 319 31. Li B, Leal SM. Methods for detecting associations with rare variants for common diseases: application  
320 to analysis of sequence data. *Am J Hum Genet* 2008;83(3):311-21. (In eng). DOI:  
321 10.1016/j.ajhg.2008.06.024.
- 322 32. Liu DJ, Leal SM. A novel adaptive method for the analysis of next-generation sequencing data to detect  
323 complex trait associations with rare variants due to gene main effects and interactions. *PLoS genetics*  
324 2010;6(10):e1001156. (In eng). DOI: 10.1371/journal.pgen.1001156.
- 325 33. Wu MC, Lee S, Cai T, Li Y, Boehnke M, Lin X. Rare-variant association testing for sequencing data with  
326 the sequence kernel association test. *Am J Hum Genet* 2011;89(1):82-93. (In eng). DOI:  
327 10.1016/j.ajhg.2011.05.029.
- 328 34. Girardin E, Grau GE, Dayer JM, Roux-Lombard P, Lambert PH. Tumor necrosis factor and interleukin-1  
329 in the serum of children with severe infectious purpura. *The New England journal of medicine*  
330 1988;319(7):397-400. (In eng). DOI: 10.1056/nejm198808183190703.

331
